# Supplementary material for: Genetic Regulation of Human isomiR Biogenesis
Source: MDPI journal article supplement (doi:10.3390/cancers15174411), 2023-09-04
Supplement: s1 [file s1]

# Genetic regulation of human isomiR biogenesis

Guanglong Jiang<sup>1,2</sup>, Jill L. Reiter<sup>2</sup>, Chuanpeng Dong<sup>3</sup>, Yue Wang<sup>2</sup>, Fang Fang<sup>2</sup>, Zhaoyang Jiang<sup>4</sup>, Yunlong Liu<sup>1,2,\*</sup>

<sup>1</sup> Department of BioHealth Informatics, Indiana University Luddy School of Informatics, Computing and Engineering, Indianapolis, IN 46202, USA

<sup>2</sup> Department of Medical and Molecular Genetics, Indiana University School of Medicine, Indianapolis, IN 46202, USA

<sup>3</sup> Department of Genetics, Yale University, New Haven, CT 06510, USA

<sup>4</sup> Department of Computer Science, Purdue University, West Lafayette, IN 47907, USA

\* Correspondence: yunliu@iu.edu; Tel.: +1-317-278-9222

**Citation:** To be added by editorial staff during production.

Academic Editor: Firstname  
Lastname

Received: date

Revised: date

Accepted: date

Published: date

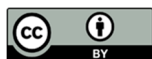

**Copyright:** © 2023 by the authors.

Submitted for possible open access publication under the terms and conditions of the Creative Commons Attribution (CC BY) license (<https://creativecommons.org/licenses/by/4.0/>).

## Supplementary Materials:

**Supplemental Figure S1.** The boxplot and statistics (mean and standard deviation, SD) of the base quality (BQ) for the first nucleotide at the 5'-end of the hsa-miR-155-5p canonical, 5'-templated extension, and 5'-non-templated addition isomiRs across all study samples.

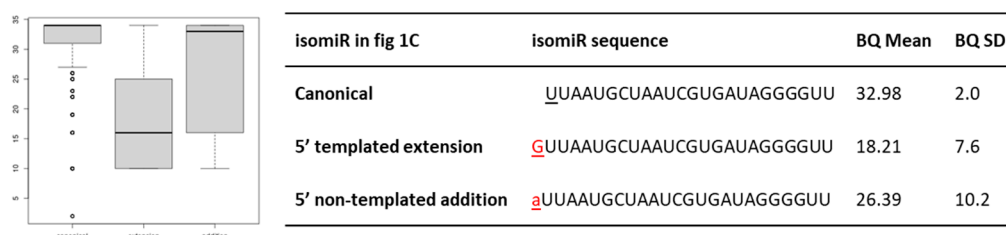

**Supplemental Figure S2.** Scatter plot of the first two principal components for 1000 Genomes Project subjects. Subjects included in this study are highlighted in colors.

CEU: Utah residents with Northern and Western European Ancestry, European Ancestry

FIN: Finnish in Finland, European Ancestry

GRB: British in England and Scotland, European Ancestry

TSI: Toscani in Italy, European Ancestry

YRI: Yoruba in Ibadan, Nigeria, African Ancestry

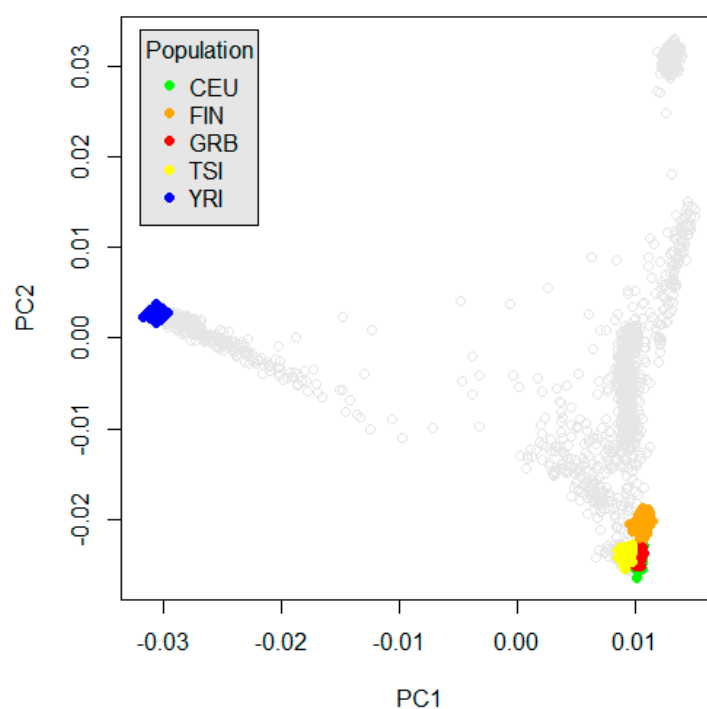

**Supplemental Figure S3.** IsomiR expression in TCGA kidney renal clear cell carcinoma. Barplot for average expression and standard error for A) hsa-miR-423-3p 5'-extension isomiRs and B) hsa-miR-423-5p 5'-trimming isomiRs in TCGA kidney renal clear cell carcinoma (TCGA-KIRC) and normal samples.

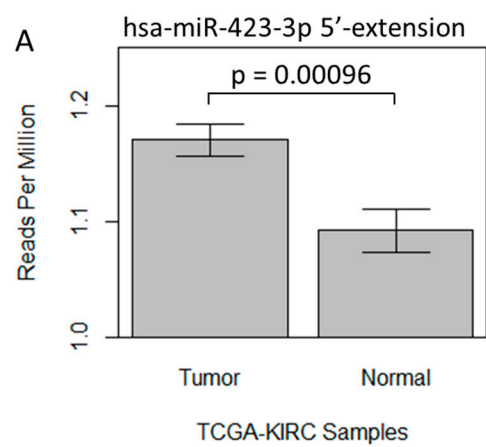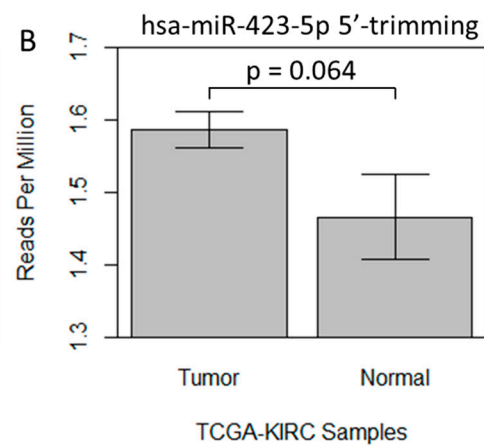

**Supplemental Table S1.** Correlation results between SNPs and isomiR compositions with FDR < 0.05 in all subjects, and FDR < 0.05 in either European or African subjects.

| SNP        | isomiR          |         |         |              | All(n=435) |         |         | European(n=348) |         |         | African(n=87) |         |         |
|------------|-----------------|---------|---------|--------------|------------|---------|---------|-----------------|---------|---------|---------------|---------|---------|
| rsID       | miRNA           | subtype | #isomiR | #base change | Tau        | p-value | FDR     | Tau             | p-value | FDR     | Tau           | p-value | FDR     |
| rs641071   | hsa-miR-4482-3p | 5-sub   | 1       | 0            | -0.64      | 5.4E-60 | 4.5E-57 | -0.59           | 7.0E-39 | 3.4E-36 | -0.30         | 7.8E-04 | 0.012   |
| rs641071   | hsa-miR-4482-3p | 5-trim  | 1       | -1           | -0.63      | 5.7E-59 | 2.4E-56 | -0.59           | 1.0E-38 | 3.4E-36 | -0.24         | 0.0054  | 0.066   |
| rs641071   | hsa-miR-4482-3p | 5-trim  | 1       | -2           | -0.63      | 8.8E-59 | 2.5E-56 | -0.59           | 1.8E-38 | 4.0E-36 | -0.21         | 0.016   | 0.15    |
| rs641071   | hsa-miR-4482-3p | 5-ext   | 1       | 1            | -0.63      | 4.7E-58 | 9.8E-56 | -0.57           | 1.6E-36 | 2.6E-34 | -0.29         | 0.0012  | 0.017   |
| rs2273626  | hsa-miR-4707-3p | 5-ext   | 1       | 1            | 0.50       | 1.0E-34 | 1.7E-32 | 0.51            | 2.4E-27 | 2.7E-25 | 0.20          | 0.035   | 0.26    |
| rs2155248  | hsa-miR-1304-3p | 5-trim  | 3       | -5           | -0.47      | 3.1E-33 | 4.3E-31 | -0.13           | 0.0025  | 0.024   | -0.59         | 4.2E-12 | 2.9E-09 |
| rs2155248  | hsa-miR-1304-3p | 5-trim  | 2       | -4           | -0.46      | 6.7E-33 | 7.4E-31 | -0.13           | 0.0025  | 0.024   | -0.58         | 8.7E-12 | 3.0E-09 |
| rs34115976 | hsa-miR-577     | 5-ext   | 15      | 1            | -0.47      | 7.1E-33 | 7.4E-31 | -0.49           | 9.5E-29 | 1.2E-26 | -0.17         | 0.057   | 0.36    |
| rs2168518  | hsa-miR-4513    | 5-add   | 3       | 4            | 0.44       | 2.7E-30 | 2.5E-28 | 0.37            | 6.9E-17 | 3.3E-15 | NA            | NA      | NA      |
| rs2155248  | hsa-miR-1304-3p | 5-ext   | 24      | 2            | 0.44       | 5.4E-30 | 4.5E-28 | 0.15            | 6.2E-04 | 0.0077  | 0.57          | 1.5E-11 | 3.6E-09 |
| rs2155248  | hsa-miR-1304-3p | 5-trim  | 6       | -3           | -0.43      | 4.1E-28 | 3.1E-26 | -0.11           | 0.014   | 0.098   | -0.49         | 9.7E-09 | 1.4E-06 |
| rs487571   | hsa-miR-5680    | 5-ext   | 9       | 2            | 0.40       | 3.1E-26 | 2.1E-24 | 0.39            | 3.6E-20 | 2.6E-18 | 0.41          | 1.2E-06 | 8.5E-05 |
| rs10061133 | hsa-miR-449b-5p | 5-sub   | 2       | 0            | -0.46      | 1.5E-23 | 1.0E-21 | -0.48           | 3.1E-20 | 2.6E-18 | -0.30         | 0.0051  | 0.062   |
| rs6505162  | hsa-miR-423-3p  | 5-ext   | 28      | 2            | -0.37      | 4.9E-23 | 3.0E-21 | -0.33           | 2.2E-15 | 9.6E-14 | -0.20         | 0.025   | 0.20    |
| rs28664200 | hsa-miR-1255a   | 5-trim  | 1       | -1           | 0.38       | 1.7E-21 | 9.5E-20 | 0.42            | 7.7E-21 | 7.2E-19 | 0.25          | 0.0050  | 0.062   |
| rs6505162  | hsa-miR-423-5p  | 5-trim  | 20      | -2           | -0.33      | 4.6E-19 | 2.4E-17 | -0.30           | 6.5E-13 | 2.4E-11 | -0.37         | 2.2E-05 | 9.0E-04 |
| rs2155248  | hsa-miR-1304-3p | 5-ext   | 22      | 1            | 0.34       | 6.3E-19 | 3.0E-17 | 0.14            | 0.0018  | 0.019   | 0.50          | 3.0E-09 | 5.2E-07 |
| rs7208391  | hsa-miR-6868-3p | 5-ext   | 2       | 1            | 0.38       | 6.4E-19 | 3.0E-17 | 0.34            | 2.6E-13 | 1.0E-11 | 0.45          | 6.1E-06 | 3.3E-04 |
| rs7911488  | hsa-miR-1307-3p | 5-trim  | 131     | -1           | -0.33      | 3.2E-18 | 1.4E-16 | -0.32           | 3.3E-14 | 1.4E-12 | -0.10         | 0.25    | 0.78    |
| rs2155248  | hsa-miR-1304-3p | 5-trim  | 54      | -1           | -0.33      | 2.7E-17 | 1.1E-15 | -0.11           | 0.0095  | 0.077   | -0.32         | 1.9E-04 | 0.0039  |
| rs8054514  | hsa-miR-3176    | 5-ext   | 2       | 1            | 0.31       | 8.1E-16 | 3.2E-14 | 0.26            | 4.0E-09 | 1.3E-07 | 0.46          | 6.6E-08 | 6.6E-06 |
| rs75538180 | hsa-miR-1303    | 5-ext   | 26      | 1            | 0.28       | 5.4E-14 | 2.0E-12 | 0.25            | 2.2E-09 | 7.2E-08 | 0.32          | 2.0E-04 | 0.0039  |
| rs8054514  | hsa-miR-3176    | 5-add   | 1       | 3            | 0.29       | 5.4E-14 | 2.0E-12 | 0.25            | 1.3E-08 | 3.4E-07 | 0.47          | 3.2E-08 | 3.7E-06 |
| rs75538180 | hsa-miR-1303    | 5-ext   | 4       | 2            | -0.28      | 6.6E-14 | 2.3E-12 | -0.22           | 1.5E-07 | 3.2E-06 | -0.22         | 0.011   | 0.11    |
| rs77639117 | hsa-miR-576-5p  | 5-trim  | 4       | -1           | 0.29       | 9.0E-14 | 3.0E-12 | 0.26            | 4.4E-09 | 1.3E-07 | 0.41          | 3.1E-06 | 1.8E-04 |
| rs8054514  | hsa-miR-3176    | 5-trim  | 3       | -1           | 0.28       | 4.8E-13 | 1.6E-11 | 0.25            | 1.8E-08 | 4.5E-07 | 0.44          | 2.4E-07 | 2.1E-05 |
| rs174561   | hsa-miR-1908-5p | 5-trim  | 1       | -1           | -0.26      | 2.8E-11 | 8.8E-10 | -0.29           | 3.2E-11 | 1.1E-09 | -0.15         | 0.094   | 0.49    |

|             |                  |        |    |    |       |         |         |       |         |         |       |         |         |
|-------------|------------------|--------|----|----|-------|---------|---------|-------|---------|---------|-------|---------|---------|
| rs7227168   | hsa-miR-4741     | 5-ext  | 1  | 3  | 0.26  | 1.1E-10 | 3.2E-09 | 0.26  | 1.8E-08 | 4.5E-07 | 0.32  | 4.3E-04 | 0.0071  |
| rs487571    | hsa-miR-5680     | 5-trim | 2  | -8 | 0.24  | 5.9E-10 | 1.7E-08 | 0.22  | 1.4E-07 | 2.9E-06 | 0.23  | 0.0069  | 0.075   |
| rs487571    | hsa-miR-5680     | 5-trim | 2  | -3 | 0.22  | 8.2E-09 | 2.3E-07 | 0.20  | 3.9E-06 | 7.0E-05 | 0.30  | 3.9E-04 | 0.0068  |
| rs487571    | hsa-miR-5680     | 5-ext  | 1  | 3  | 0.22  | 1.0E-08 | 2.8E-07 | 0.21  | 1.0E-06 | 1.9E-05 | 0.22  | 0.011   | 0.11    |
| rs8054514   | hsa-miR-3176     | 5-sub  | 6  | 0  | 0.22  | 1.1E-08 | 2.9E-07 | 0.17  | 6.7E-05 | 0.0011  | 0.41  | 1.7E-06 | 1.1E-04 |
| rs2682818   | hsa-miR-618      | 5-trim | 1  | -6 | 0.22  | 1.3E-08 | 3.3E-07 | 0.25  | 1.2E-08 | 3.4E-07 | 0.34  | 7.9E-05 | 0.0022  |
| rs74085143  | hsa-miR-4781-3p  | 5-trim | 5  | -2 | 0.23  | 1.3E-08 | 3.3E-07 | 0.14  | 0.0018  | 0.019   | 0.39  | 1.2E-05 | 5.7E-04 |
| rs487571    | hsa-miR-5680     | 5-ext  | 1  | 7  | 0.21  | 1.7E-08 | 4.0E-07 | 0.21  | 1.3E-06 | 2.4E-05 | 0.20  | 0.019   | 0.17    |
| rs487571    | hsa-miR-5680     | 5-ext  | 2  | 5  | 0.20  | 7.5E-08 | 1.7E-06 | 0.19  | 7.9E-06 | 1.3E-04 | 0.22  | 0.0089  | 0.096   |
| rs2682818   | hsa-miR-618      | 5-trim | 1  | -7 | 0.21  | 8.0E-08 | 1.8E-06 | 0.24  | 3.7E-08 | 9.0E-07 | 0.32  | 2.0E-04 | 0.0039  |
| rs487571    | hsa-miR-5680     | 5-trim | 1  | -4 | 0.20  | 8.0E-08 | 1.8E-06 | 0.19  | 6.6E-06 | 1.1E-04 | 0.21  | 0.012   | 0.12    |
| rs2682818   | hsa-miR-618      | 5-trim | 2  | -1 | 0.21  | 8.7E-08 | 1.9E-06 | 0.24  | 4.0E-08 | 9.2E-07 | 0.35  | 6.8E-05 | 0.0022  |
| rs2682818   | hsa-miR-618      | 5-trim | 2  | -3 | 0.21  | 9.7E-08 | 2.0E-06 | 0.24  | 3.9E-08 | 9.1E-07 | 0.32  | 2.9E-04 | 0.0054  |
| rs4822739   | hsa-miR-548j-5p  | 5-sub  | 2  | 0  | -0.22 | 1.0E-07 | 2.1E-06 | -0.11 | 0.018   | 0.12    | -0.40 | 8.6E-06 | 4.3E-04 |
| rs487571    | hsa-miR-5680     | 5-trim | 6  | -1 | 0.20  | 2.0E-07 | 3.9E-06 | 0.17  | 8.4E-05 | 0.0013  | 0.32  | 1.5E-04 | 0.0036  |
| rs7911488   | hsa-miR-1307-3p  | 5-trim | 2  | -6 | 0.20  | 2.1E-07 | 4.1E-06 | 0.15  | 5.0E-04 | 0.0064  | 0.12  | 0.16    | 0.63    |
| rs9589207   | hsa-miR-92a-1-5p | 5-trim | 5  | -2 | -0.20 | 2.7E-07 | 5.1E-06 | NA    | NA      | NA      | -0.43 | 1.1E-06 | 8.5E-05 |
| rs5997893   | hsa-miR-3928-3p  | 5-trim | 33 | -2 | -0.20 | 2.7E-07 | 5.1E-06 | -0.13 | 0.0025  | 0.024   | -0.11 | 0.21    | 0.70    |
| rs2682818   | hsa-miR-618      | 5-trim | 2  | -5 | 0.20  | 3.5E-07 | 6.3E-06 | 0.23  | 2.5E-07 | 5.0E-06 | 0.36  | 4.3E-05 | 0.0015  |
| rs2682818   | hsa-miR-618      | 5-trim | 2  | -4 | 0.19  | 8.1E-07 | 1.4E-05 | 0.23  | 1.4E-07 | 2.9E-06 | 0.30  | 5.2E-04 | 0.0085  |
| rs151318590 | hsa-miR-500b-3p  | 5-ext  | 2  | 2  | -0.22 | 1.1E-06 | 2.0E-05 | NA    | NA      | NA      | -0.42 | 1.7E-05 | 7.3E-04 |
| rs4822739   | hsa-miR-548j-5p  | 5-add  | 2  | 1  | -0.20 | 1.4E-06 | 2.3E-05 | -0.09 | 0.048   | 0.26    | -0.37 | 4.4E-05 | 0.0015  |
| rs9589207   | hsa-miR-92a-1-5p | 5-trim | 3  | -3 | -0.19 | 1.7E-06 | 2.8E-05 | NA    | NA      | NA      | -0.33 | 1.6E-04 | 0.0036  |
| rs151318590 | hsa-miR-500b-3p  | 5-trim | 1  | -4 | -0.21 | 1.8E-06 | 2.9E-05 | NA    | NA      | NA      | -0.40 | 3.4E-05 | 0.0013  |
| rs2682818   | hsa-miR-618      | 5-trim | 3  | -2 | 0.19  | 1.9E-06 | 3.0E-05 | 0.22  | 4.9E-07 | 9.5E-06 | 0.30  | 5.6E-04 | 0.0089  |
| rs7911488   | hsa-miR-1307-3p  | 5-trim | 2  | -7 | 0.18  | 2.4E-06 | 3.6E-05 | 0.14  | 8.2E-04 | 0.0096  | 0.05  | 0.58    | 0.88    |
| rs74085143  | hsa-miR-4781-3p  | 5-trim | 3  | -1 | 0.19  | 2.7E-06 | 4.0E-05 | 0.11  | 0.020   | 0.13    | 0.35  | 7.8E-05 | 0.0022  |
| rs9589207   | hsa-miR-92a-1-5p | 5-trim | 3  | -1 | -0.18 | 3.0E-06 | 4.4E-05 | NA    | NA      | NA      | -0.34 | 1.0E-04 | 0.0026  |
| rs74085143  | hsa-miR-4781-3p  | 5-trim | 1  | -4 | 0.19  | 4.3E-06 | 6.2E-05 | 0.12  | 0.0095  | 0.077   | 0.35  | 9.3E-05 | 0.0025  |
| rs1439619   | hsa-miR-3175     | 5-add  | 1  | 4  | -0.20 | 4.5E-06 | 6.3E-05 | -0.22 | 7.7E-06 | 1.3E-04 | -0.13 | 0.18    | 0.65    |
| rs4822739   | hsa-miR-548j-5p  | 5-ext  | 1  | 8  | -0.19 | 5.1E-06 | 7.2E-05 | -0.08 | 0.082   | 0.34    | -0.36 | 7.8E-05 | 0.0022  |

|             |                  |        |    |    |       |         |         |       |         |         |       |         |        |
|-------------|------------------|--------|----|----|-------|---------|---------|-------|---------|---------|-------|---------|--------|
| rs35613341  | hsa-miR-5189-5p  | 5-trim | 1  | -1 | 0.20  | 6.5E-06 | 9.0E-05 | 0.21  | 4.0E-05 | 6.4E-04 | 0.20  | 0.040   | 0.27   |
| rs4822739   | hsa-miR-548j-5p  | 5-add  | 1  | 2  | -0.18 | 1.2E-05 | 1.5E-04 | -0.08 | 0.080   | 0.34    | -0.35 | 1.3E-04 | 0.0032 |
| rs10422347  | hsa-miR-4745-5p  | 5-add  | 1  | 2  | 0.18  | 1.3E-05 | 1.6E-04 | 0.18  | 9.2E-05 | 0.0014  | 0.13  | 0.14    | 0.59   |
| rs4534339   | hsa-miR-1843     | 5-ext  | 29 | 1  | -0.17 | 1.3E-05 | 1.6E-04 | -0.09 | 0.034   | 0.20    | -0.29 | 7.7E-04 | 0.012  |
| rs9589207   | hsa-miR-92a-1-5p | 5-ext  | 1  | 1  | -0.17 | 1.4E-05 | 1.8E-04 | NA    | NA      | NA      | -0.28 | 0.0013  | 0.018  |
| rs4822739   | hsa-miR-548j-3p  | 5-trim | 1  | -2 | -0.20 | 1.6E-05 | 2.0E-04 | -0.05 | 0.39    | 0.67    | -0.38 | 1.9E-04 | 0.0039 |
| rs7911488   | hsa-miR-1307-3p  | 5-add  | 4  | 1  | 0.16  | 1.6E-05 | 2.0E-04 | 0.15  | 4.0E-04 | 0.0054  | 0.02  | 0.86    | 0.98   |
| rs9589207   | hsa-miR-92a-1-5p | 5-trim | 1  | -4 | -0.17 | 1.8E-05 | 2.2E-04 | NA    | NA      | NA      | -0.28 | 0.0018  | 0.024  |
| rs151318590 | hsa-miR-500b-3p  | 5-trim | 1  | -3 | -0.19 | 2.0E-05 | 2.3E-04 | NA    | NA      | NA      | -0.34 | 4.0E-04 | 0.0068 |
| rs2620381   | hsa-miR-627-5p   | 5-trim | 6  | -1 | -0.17 | 2.1E-05 | 2.5E-04 | -0.06 | 0.17    | 0.46    | -0.32 | 3.9E-04 | 0.0068 |
| rs151318590 | hsa-miR-500b-3p  | 5-ext  | 1  | 1  | -0.19 | 2.4E-05 | 2.8E-04 | NA    | NA      | NA      | -0.35 | 3.2E-04 | 0.0059 |
| rs9589207   | hsa-miR-92a-1-5p | 5-sub  | 21 | 0  | -0.16 | 3.1E-05 | 3.5E-04 | NA    | NA      | NA      | -0.33 | 1.9E-04 | 0.0039 |
| rs56292801  | hsa-miR-5189-5p  | 5-trim | 1  | -1 | 0.19  | 3.9E-05 | 4.4E-04 | 0.18  | 3.0E-04 | 0.0043  | 0.19  | 0.060   | 0.37   |
| rs9589207   | hsa-miR-92a-1-5p | 5-add  | 1  | 1  | -0.16 | 4.9E-05 | 5.4E-04 | NA    | NA      | NA      | -0.28 | 0.0014  | 0.019  |
| rs2427556   | hsa-miR-941      | 5-add  | 2  | 1  | 0.15  | 1.1E-04 | 0.0011  | 0.15  | 4.0E-04 | 0.0054  | 0.33  | 7.0E-05 | 0.0022 |
| rs10422347  | hsa-miR-4745-5p  | 5-trim | 1  | -4 | 0.15  | 1.3E-04 | 0.0014  | 0.15  | 7.8E-04 | 0.0094  | 0.13  | 0.16    | 0.63   |
| rs10422347  | hsa-miR-4745-5p  | 5-ext  | 2  | 1  | 0.15  | 2.8E-04 | 0.0029  | 0.14  | 0.0015  | 0.016   | 0.11  | 0.21    | 0.71   |
| rs6413505   | hsa-miR-6886-5p  | 5-trim | 2  | -2 | 0.16  | 3.4E-04 | 0.0034  | 0.07  | 0.19    | 0.49    | 0.38  | 1.5E-04 | 0.0036 |
| rs2854001   | hsa-miR-6891-5p  | 5-ext  | 18 | 1  | -0.16 | 4.0E-04 | 0.0040  | -0.16 | 0.0011  | 0.012   | -0.04 | 0.70    | 0.91   |
| rs74085143  | hsa-miR-4781-3p  | 5-sub  | 1  | 0  | 0.14  | 4.6E-04 | 0.0045  | 0.11  | 0.020   | 0.13    | 0.26  | 0.0036  | 0.046  |
| rs13186787  | hsa-miR-1294     | 5-trim | 2  | -1 | -0.14 | 4.9E-04 | 0.0047  | -0.16 | 3.8E-04 | 0.0053  | NA    | NA      | NA     |
| rs75715827  | hsa-miR-944      | 5-ext  | 8  | 1  | -0.14 | 5.0E-04 | 0.0047  | -0.14 | 0.0013  | 0.014   | NA    | NA      | NA     |
| rs4534339   | hsa-miR-1843     | 5-ext  | 1  | 5  | 0.13  | 5.8E-04 | 0.0053  | 0.07  | 0.13    | 0.42    | 0.25  | 0.0034  | 0.044  |
| rs13186787  | hsa-miR-1294     | 5-ext  | 3  | 1  | -0.14 | 6.1E-04 | 0.0055  | -0.15 | 7.2E-04 | 0.0087  | NA    | NA      | NA     |
| rs12314280  | hsa-miR-5700     | 5-trim | 2  | -2 | 0.15  | 8.7E-04 | 0.0077  | 0.18  | 4.5E-04 | 0.0059  | 0.04  | 0.68    | 0.91   |
| rs78979347  | hsa-miR-9903     | 5-sub  | 2  | 0  | -0.15 | 0.0011  | 0.0092  | -0.17 | 5.8E-04 | 0.0073  | NA    | NA      | NA     |
| rs4534339   | hsa-miR-1843     | 5-trim | 2  | -3 | 0.13  | 0.0013  | 0.012   | 0.06  | 0.18    | 0.48    | 0.25  | 0.0034  | 0.044  |
| rs10422347  | hsa-miR-4745-5p  | 5-trim | 6  | -2 | 0.13  | 0.0016  | 0.014   | 0.13  | 0.0034  | 0.032   | 0.05  | 0.55    | 0.87   |
| rs191321849 | hsa-miR-500a-3p  | 5-ext  | 29 | 1  | 0.12  | 0.0019  | 0.015   | 0.13  | 0.0026  | 0.025   | NA    | NA      | NA     |
| rs191321849 | hsa-miR-500a-3p  | 5-trim | 4  | -4 | 0.12  | 0.0025  | 0.020   | 0.12  | 0.0047  | 0.043   | NA    | NA      | NA     |
| rs174561    | hsa-miR-1908-3p  | 5-ext  | 16 | 1  | -0.12 | 0.0027  | 0.021   | -0.16 | 2.2E-04 | 0.0032  | -0.03 | 0.73    | 0.93   |

|             |                 |        |   |    |       |        |       |       |        |       |       |        |       |
|-------------|-----------------|--------|---|----|-------|--------|-------|-------|--------|-------|-------|--------|-------|
| rs75258105  | hsa-miR-5700    | 5-trim | 2 | -2 | 0.14  | 0.0029 | 0.022 | 0.16  | 0.0015 | 0.016 | NA    | NA     | NA    |
| rs515924    | hsa-miR-548a1   | 5-trim | 1 | -1 | -0.12 | 0.0036 | 0.027 | -0.14 | 0.0027 | 0.026 | -0.07 | 0.48   | 0.87  |
| rs191321849 | hsa-miR-500a-3p | 5-trim | 8 | -1 | 0.11  | 0.0036 | 0.027 | 0.12  | 0.0049 | 0.043 | NA    | NA     | NA    |
| rs6413505   | hsa-miR-6886-5p | 5-trim | 3 | -1 | 0.13  | 0.0052 | 0.036 | 0.06  | 0.26   | 0.56  | 0.32  | 0.0014 | 0.019 |
| rs78979347  | hsa-miR-9903    | 5-trim | 2 | -1 | -0.12 | 0.0055 | 0.037 | -0.15 | 0.0018 | 0.019 | NA    | NA     | NA    |
| rs13186787  | hsa-miR-1294    | 5-ext  | 2 | 3  | -0.11 | 0.0069 | 0.044 | -0.13 | 0.0048 | 0.043 | NA    | NA     | NA    |
